# Supplementary material
Source: publisher figshare collection journal article supplement (https://frontiersin.figshare.com/ndownloader/files/21991176)
Supplement: Supplementary file [file 21991176]

*Supplementary Material for*

**Advancing Agricultural Production with Machine Learning  
Analytics: Yield Determinants for California's Almond  
Orchards**

**Yufang Jin<sup>1\*</sup>, Bin Chen<sup>1</sup>, Bruce Lampinen<sup>2</sup>, and Patrick Brown<sup>2</sup>**

<sup>1</sup>Department of Land, Air and Water Resources, University of California, Davis, CA 95616, USA

<sup>2</sup>Department of Plant Sciences, University of California, Davis, CA 95616, USA

**\* Correspondence:**

Yufang Jin

yujin@ucdavis.edu

Supplementary Figures

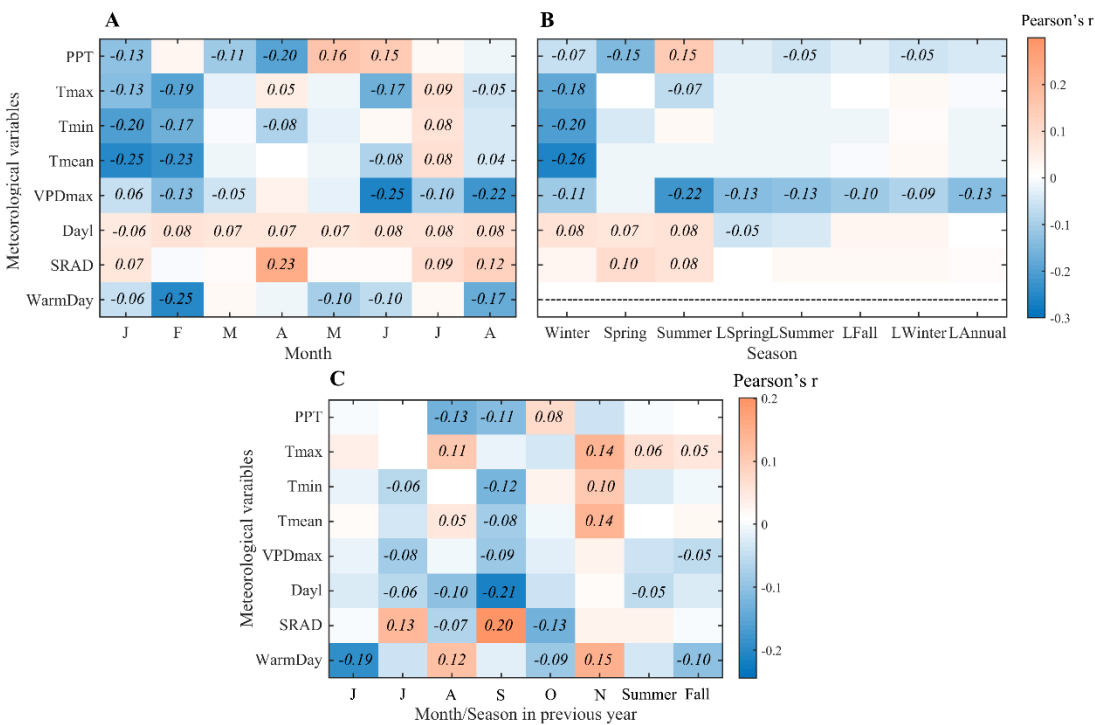

**Supplementary Figure 1.** The correlation between the normalized yield from Nonpareil samples (n = 5581) and (A) monthly and (B) seasonal meteorological variables in current year and (C) in preceding year. Note that the italic Pearson's r represents the correlation is statistically significant with a p-value < 0.001.

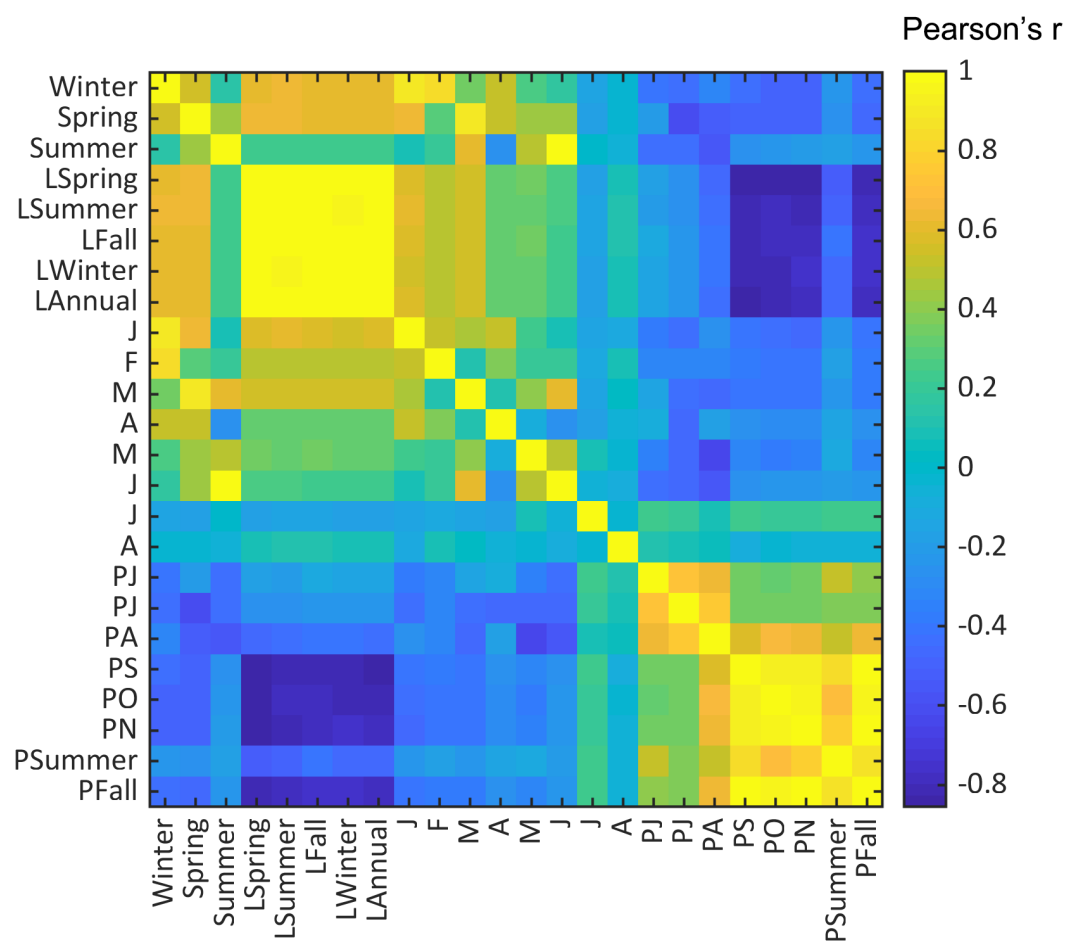

**Supplementary Figure 2.** Cross-correlation of variables from different time periods, taking precipitation as an example.

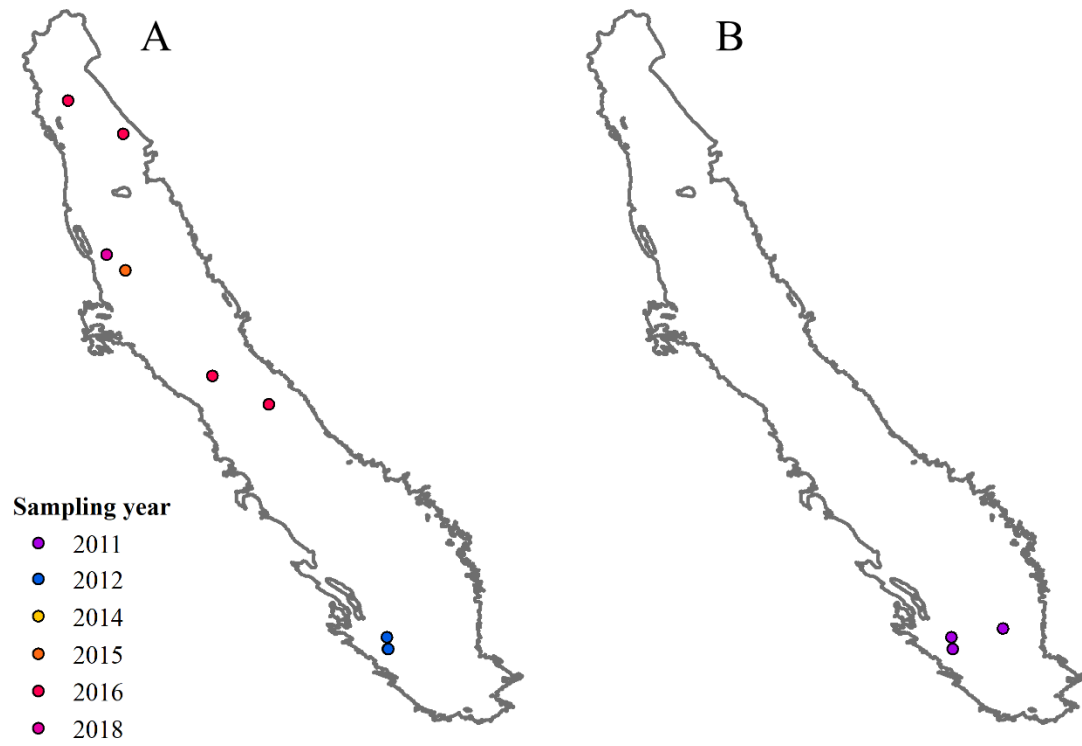

**Supplementary Figure 3.** Spatiotemporal distribution of samples with (A) largest yield gaps (N = 596) and (B) lowest yield gaps (N = 223).

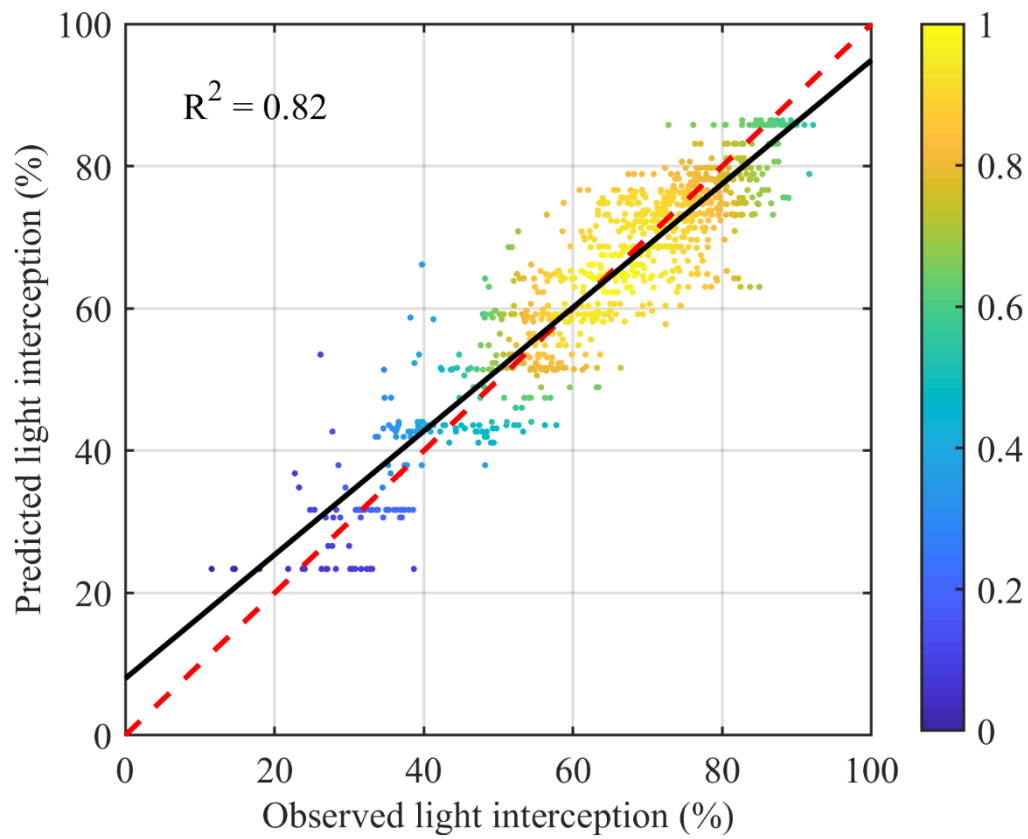

**Supplementary Figure 4.** Comparison of the observed and predicted light interception using biological variables and full climatic variables, based on the random forest model.

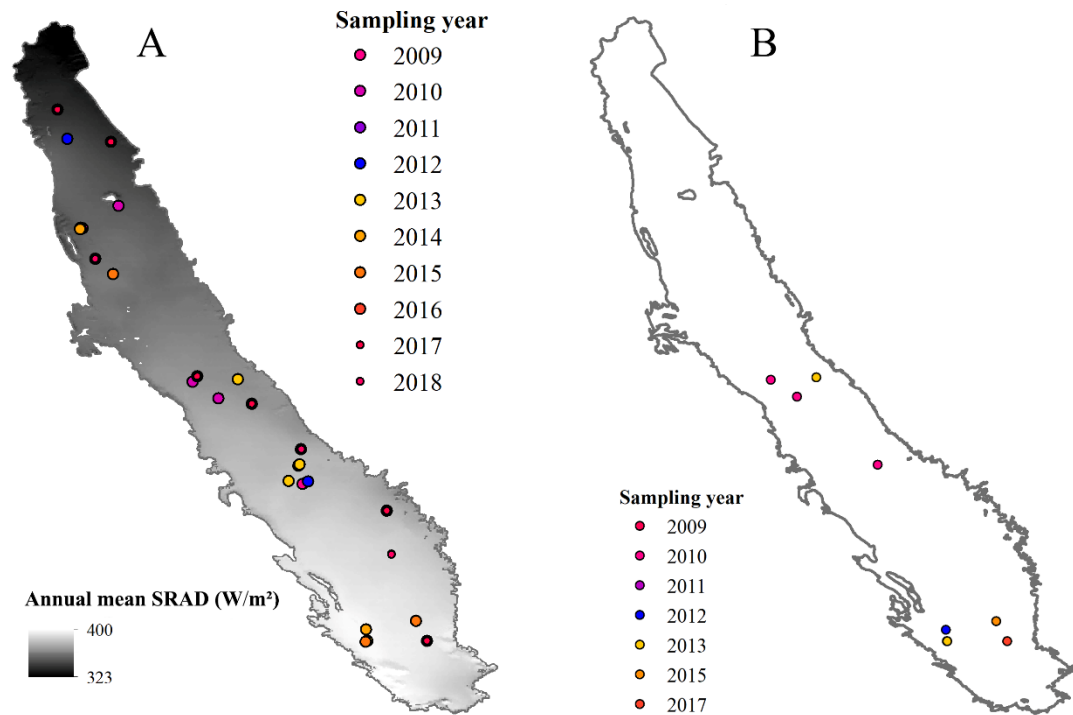

**Supplementary Figure 5.** Spatial map of (A) 10-year annual mean SRAD from 2009-2018 with almond sites colored by sampling years, and (B) almond sites with higher light interceptions (N = 440).

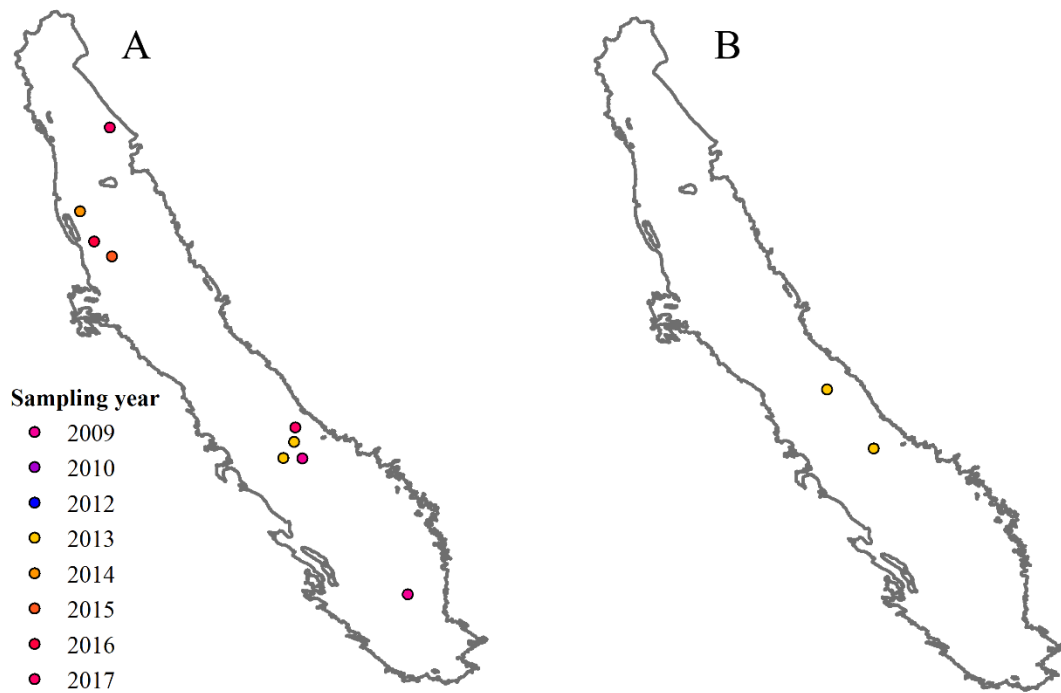

**Supplementary Figure 6.** Spatiotemporal distribution of samples with (A) higher light interceptions for young orchards ( $N = 860$ ) and (B) lower light interceptions for mature orchards ( $N = 61$ ).

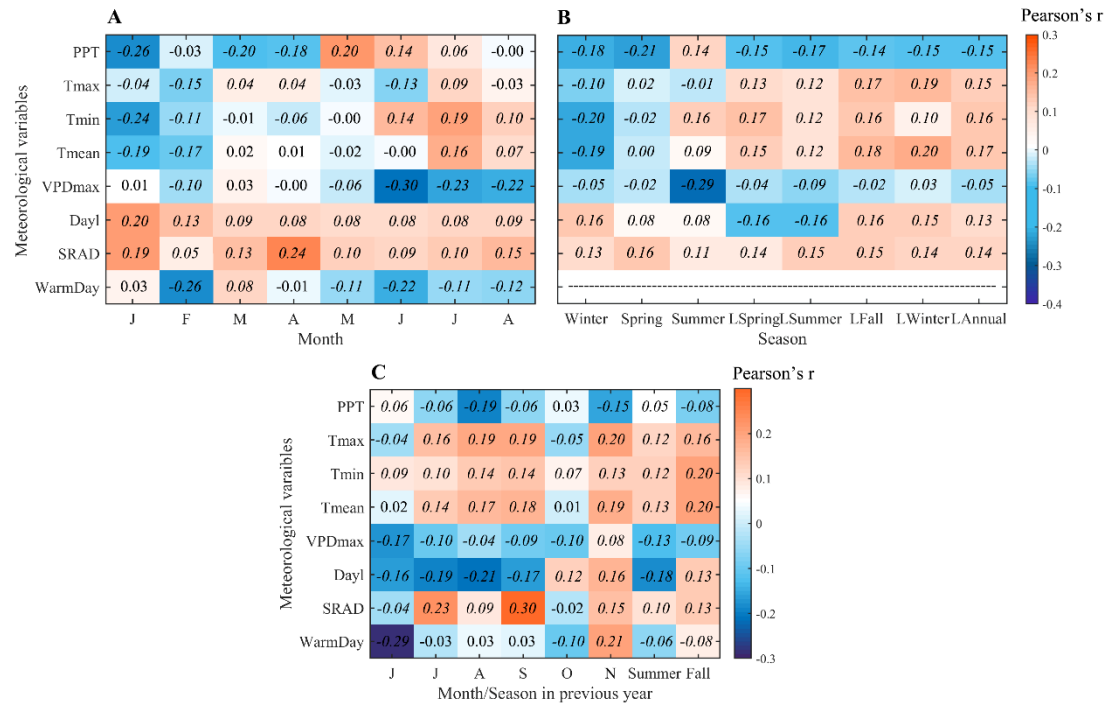

**Supplementary Figure 7.** The correlation between the actual yield from all almond samples (n=7864) and (A) monthly and (B) seasonal meteorological variables in current year and (C) in preceding year. Note that the italic Pearson's r represents the correlation is statistically significant with a p-value < 0.001.



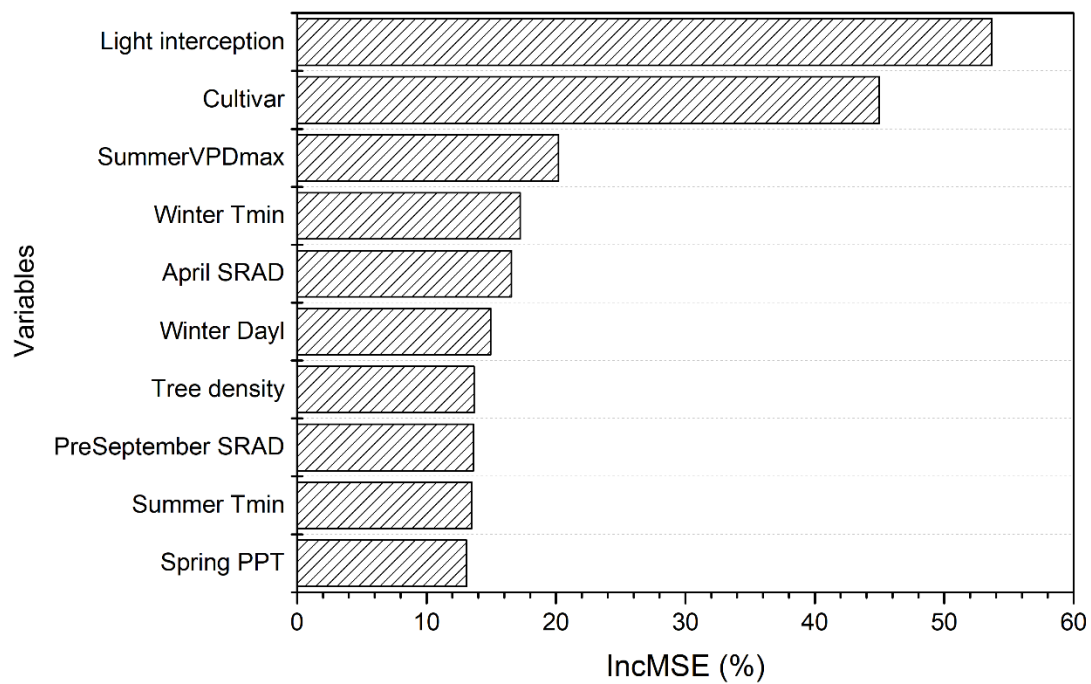

**Supplementary Figure 8.** Variable importance derived from the random forest model using field variables and selected meteorological variables.

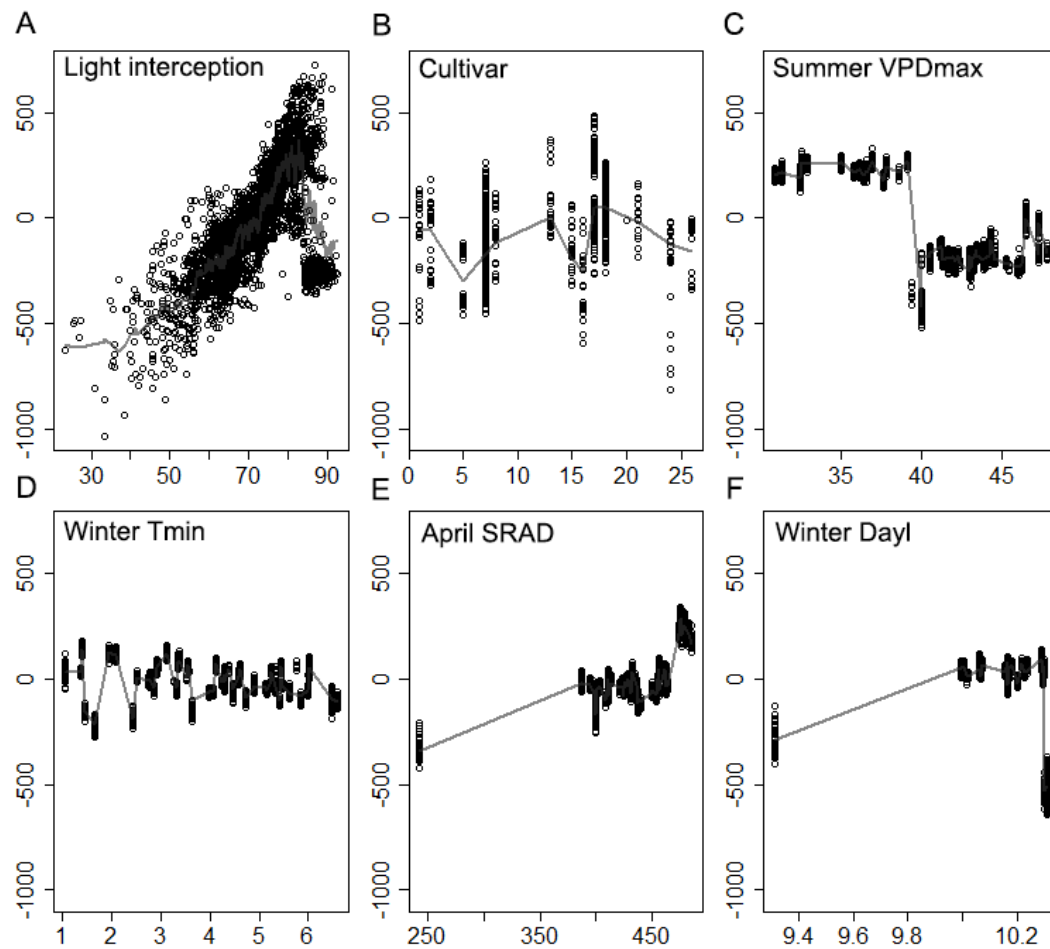

**Supplementary Figure 9.** Partial dependence of yield on different variables using mature orchards with age from 7 to 18 years ( $n = 4337$ ).

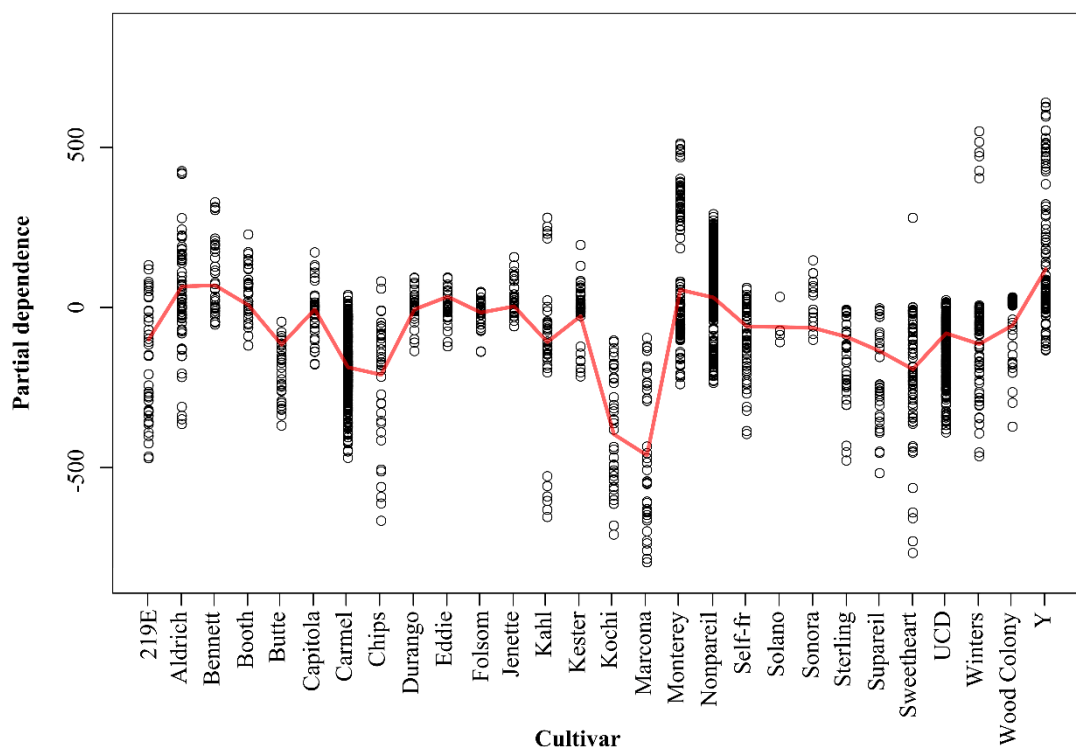

**Supplementary Figure 10.** Partial dependence of almond yield on different cultivars using mature orchards with age from 7 to 18.

**Supplementary Table 1. Selected variables for modelling the determinants on yield gaps**

| <b>Category</b>                  | <b>Specific variables</b>                               |
|----------------------------------|---------------------------------------------------------|
| Precipitation                    | Spring PPT, Summer PPT                                  |
| Temperature                      | Winter Tmean, mean June daily Tmax,                     |
| Vapor Pressure Deficit           | Mean summer daily VPDmax                                |
| Daylight duration                | Previous September Dayl                                 |
| Shortwave Radiation Flux Density | April SRAD, Previous September SRAD                     |
| Number of Warm Day               | February WarmDay, August WarmDay, Previous June WarmDay |

**Supplementary Table 2. Selected variables for modelling the determinants on the yield variation**

| Category                         | Specific variables                                                          |
|----------------------------------|-----------------------------------------------------------------------------|
| Precipitation                    | January PPT, Spring PPT, Long-term Summer PPT                               |
| Temperature                      | Previous mean November daily Tmax, mean winter Tmin, mean summer daily Tmin |
| Vapor Pressure Deficit           | Mean summer daily VPDmax                                                    |
| Daylight duration                | Winter Dayl                                                                 |
| Shortwave Radiation Flux Density | April SRAD, Previous September SRAD                                         |
| Number of Warm Day               | February WarmDay, Preceding June WarmDay                                    |
